# Supplementary material for: WITHDRAWN: PLK1&nbsp;is a Potential Prognostic Factor Associated With the Tumor Microenvironment During Lung Adenocarcinoma Progression
Source: Research Square preprint supplement (doi:10.21203/rs.3.rs-105349/v1), 2020-11-17
Supplement: Supplementary file 1 [file 05f9264a6a947f09d3e7f508.xlsx]

## Sheet: Sheet1
Table S2 KEGG enrichment analysis for the DEGs
ID	Description	pvalue	p.adjust	qvalue	gene	Count
hsa04110	Cell cycle	8.20407e-08	2.31355e-05	2.21078e-05	BUB1,BUB1B,CCNA2,CCNB1,CCNE1,CDK1,CDC6,CDC20,CDC25C,CDKN2A,CHEK1,MAD2L1,MCM2,MCM4,ORC1,PLK1,TTK,CDC45,PKMYT1,CCNB2,PTTG1,ESPL1,ORC6	23
hsa04974	Protein digestion and absorption	5.20506e-06	0.000654691	0.00062561	COL1A1,COL2A1,COL3A1,COL5A1,COL5A2,COL7A1,COL10A1,COL11A1,COL17A1,CPB2,KCNN4,MME,PRSS1,PRSS2,PRSS3,SLC1A1,COL25A1,COL6A6	18
hsa05144	Malaria	6.9648e-06	0.000654691	0.00062561	CD36,COMP,CSF3,ACKR1,HBA2,HBB,IL6,PECAM1,SELE,SELP,THBS2,THBS4	12
hsa04512	ECM-receptor interaction	4.30971e-05	0.00303835	0.00290338	CD36,COL1A1,COL2A1,COMP,HMMR,IBSP,SPP1,THBS2,THBS4,TNXB,VTN,VWF,ITGA8,ITGA11,COL6A6	15
hsa04610	Complement and coagulation cascades	0.000421857	0.0237927	0.0227359	C8B,CPB2,CFD,F5,F12,FGA,FGB,PLAU,PROC,THBD,VTN,VWF,VSIG4	13
hsa04080	Neuroactive ligand-receptor interaction	0.000861057	0.0392316	0.0374889	ADRB1,ADRB2,AGT,AGTR2,CALCA,CGA,CHRNA5,S1PR1,EDN1,EDNRB,FPR2,GABRP,GRIN2D,HTR1D,NPY,NTS,P2RY6,PRSS1,PRSS2,PRSS3,SST,SSTR1,TAC1,VIPR1,CALCRL,NMU,GAL,CHRNA9,KISS1R,UCN3,TAC4,NPW	32
hsa04114	Oocyte meiosis	0.000973834	0.0392316	0.0374889	BUB1,CALML3,CCNB1,CCNE1,CDK1,CDC20,CDC25C,MAD2L1,PLK1,AURKA,PKMYT1,CCNB2,PTTG1,ESPL1,CALML5,SGO1	16
hsa04115	p53 signaling pathway	0.0013089	0.0461386	0.0440892	ADGRB1,CCNB1,CCNE1,CDK1,CDKN2A,CHEK1,IGFBP3,SERPINB5,RRM2,CCNB2,GTSE1	11
