# Supplementary material for: WITHDRAWN: PLK1&nbsp;is a Potential Prognostic Factor Associated With the Tumor Microenvironment During Lung Adenocarcinoma Progression
Source: Research Square preprint supplement (doi:10.21203/rs.3.rs-105349/v1), 2020-11-17
Supplement: Supplementary file 2 [file f3475dccc74a16e1c8756560.xlsx]

## Sheet: Sheet1
Table S3 Immune cells significantly associated with PLK1 expression
Immune cells	Difference analysis (pvalue)	Correlation coefficient (pvalue)
T cells CD8	0.005	0.170(<0.001)
T cells CD4 memory resting	<0.001	-0.280(<0.001)
T cells CD4 memory activated	<0.001	0.400(<0.001)
NK cells resting	<0.001	0.320(<0.001)
NK cells activated	<0.001	-0.170(<0.001)
Monocytes	<0.001	-0.200(<0.001)
Macrophages M0	<0.001	0.330(<0.001)
Macrophages M1	<0.001	0.310(<0.001)
Dendritic cells resting	<0.001	-0.270(<0.001)
Dendritic cells activated	0.030	-0.130(0.007)
Mast cells resting	<0.001	-0.390(<0.001)
Mast cells activated	<0.001	0.150(0.003)
